# Supplementary material for: Use of a Yeast tRNase Killer Toxin to Diagnose Kti12 Motifs Required for tRNA Modification by Elongator
Source: PubMed Central journal article supplement (PMC5618205; doi:10.3390/toxins9090272), 2017-09-05
Supplement: toxins-09-00272-s001.pdf [file toxins-09-00272-s001.pdf]

# Supplementary Materials: Use of a Yeast tRNase Killer Toxin to Diagnose Kti12 Motifs Required for tRNA Modification by Elongator

Constance Mehlgarten, Heike Prochaska, Alexander Hammermeister, Wael Abdel-Fattah, Melanie Wagner, Rościław Krutyhołow, Sang Eun Jun, Gyung-Tae Kim, Sebastian Glatt, Karin, D. Breunig, Michael J.R. Stark and Raffael Schaffrath

## 1. Supplementary Tables

Table S1. Yeast strains.

| Strain                            | Genotype                                                                                                     | Source/Reference |
|-----------------------------------|--------------------------------------------------------------------------------------------------------------|------------------|
| <i>Kluyveromyces lactis</i> :     |                                                                                                              |                  |
| AWJ137                            | $\alpha$ <i>leu2 trp1</i> [k1/k2] zymocin producer, killer yeast                                             | K.D. Breunig     |
| <i>Saccharomyces cerevisiae</i> : |                                                                                                              |                  |
| LL20                              | <i>MAT<math>\alpha</math> leu2-3, 112 his3-11, 15 can1</i>                                                   | M.J.R. Stark     |
| ARB18; 46; 47; 72; 76; 78         | LL20, <i>kti12-1; kti12-2; kti12-3; kti12-4; kti12-5; kti12-6</i>                                            | [1]              |
| KY117                             | <i>MAT<math>\alpha</math> ura3-52 trp1-<math>\Delta</math>1 lys2-801 ade2-101 his3<math>\Delta</math>200</i> | M.J.R. Stark     |
| ARBK53; 67                        | KY117, <i>kti12-7; kti12-8</i>                                                                               | [1]              |
| SSY1                              | LL20, <i>KTI12-c-myc::SpHIS3</i>                                                                             | This study       |
| SSY2                              | ARB46, <i>kti12-2-c-myc::SpHIS3</i>                                                                          | This study       |
| SSY3                              | ARB72, <i>kti12-4-c-myc::SpHIS3</i>                                                                          | This study       |
| SSY4                              | ARBK67, <i>kti12-8-c-myc::SpHIS3</i>                                                                         | This study       |
| SSY5                              | ARB47, <i>kti12-3-c-myc::SpHIS3</i>                                                                          | This study       |
| W303-1A                           | <i>MAT<math>\alpha</math> ade2-1 his3-11, 15 leu2-3, -112 trp1-1 ura3-1 can1-100</i>                         | Lab stock        |
| CY4209                            | W303-1A, <i>SSD1-v1</i>                                                                                      | Lab stock        |
| SSY8                              | CY4209, <i>ELP2-HA::KITR1 KTI12-c-myc::SpHIS3</i>                                                            | This study       |
| SSY16                             | CY4209, <i>ELP2-HA::KITR1 kti12-2-c-myc::SpHIS3</i>                                                          | This study       |
| SSY12                             | CY4209, <i>ELP2-HA::KITR1 kti12-8-c-myc::SpHIS3</i>                                                          | This study       |
| RZY06                             | CY4209, <i>KTI13-c-myc::SpHIS3</i>                                                                           | R. Zabel         |
| TOT4TAP                           | CY4209, <i>KTI121-TAP::KITR1</i>                                                                             | L. Fichtner      |
| DJY104                            | CY4209, <i>kti12<math>\Delta</math>::KILEU2 ELP1-HA::KITR1</i>                                               | [2]              |
| W303-1B                           | W303-1A, <i>MAT<math>\alpha</math></i>                                                                       | Lab stock        |
| UMY2893                           | W303-1B, <i>SUP4</i>                                                                                         | [3]              |
| UMY2916                           | UMY2893, <i>elp3<math>\Delta</math>::kanMX4</i>                                                              | [3]              |
| UMY2938                           | UMY2893, <i>kti12<math>\Delta</math>::kanMX4</i>                                                             | [2]              |
| 126                               | <i>MAT<math>\alpha</math> trp1-289 ura3-52 leu2-3/112 can1 ade1,2 CDC8</i>                                   | [4]              |
| 199                               | 126, <i>ADE1,2 cdc8-1<sup>ts</sup></i>                                                                       | [4]              |
| 206                               | 199, <i>SOE1</i>                                                                                             | [4]              |
| 126 $\Delta$ 12                   | 126, <i>kti12<math>\Delta</math>::KILEU2</i>                                                                 | This study       |
| 206 $\Delta$ 12                   | 206, <i>kti12<math>\Delta</math>::KILEU2</i>                                                                 | This study       |
| 206 $\Delta$ 12                   | 206, <i>elp3<math>\Delta</math>::KILEU2</i>                                                                  | [5]              |
| RCY2866                           | <i>MAT<math>\alpha</math> ura3-52 leu2-3,112 SEC2</i>                                                        | [6]              |
| RCY3256                           | RCY2866, <i>sec2-59<sup>ts</sup></i>                                                                         | [6]              |
| RCY1903                           | RCY3256, <i>elp1<math>\Delta</math>::URA3</i>                                                                | [6]              |
| CMY85                             | RCY3256, <i>kti12<math>\Delta</math>::URA3</i>                                                               | This study       |
| ANY21                             | <i>MAT<math>\alpha</math> ura3-52 leu2-3, 112 trp1-289 his3 his4 suc gal2 SEC12</i>                          | [7]              |
| MBY10-7A                          | ANY21, <i>sec12-4<sup>ts</sup></i>                                                                           | [7]              |
| CMY78                             | MBY10-7A, <i>elp1<math>\Delta</math>::KILEU2</i>                                                             | This study       |
| CMY74                             | MBY10-7A, <i>kti12<math>\Delta</math>::KILEU2</i>                                                            | This study       |

Table S2. Primers.

| Primer                | Sequence (5'-3')                                                    | Application        |
|-----------------------|---------------------------------------------------------------------|--------------------|
| <i>KTI12</i> -P       | tctcataccaaccggaagg                                                 | seq <i>KTI12</i>   |
| <i>KTI12</i> -1       | ttgtcatcgtcatcgcatg                                                 | seq <i>KTI12</i>   |
| <i>KTI12</i> -2       | ttcttactcctcaggacaac                                                | seq <i>KTI12</i>   |
| <i>KTI12</i> -3       | aagcccttactcaacggatc                                                | seq <i>KTI12</i>   |
| <i>KTI12</i> -4       | taccagttgagaagacgag                                                 | seq <i>KTI12</i>   |
| ko <i>KTI12</i> fw    | aaactaaacaggcaatttagtaagaagatgccactggtgcttttacggcgac                | ko <i>KTI12</i>    |
| ko <i>KTI12</i> rv    | atctcaattcaagttttgtaagataatcagcgaaaagcggaccgatccagct                | ko <i>KTI12</i>    |
| S3- <i>KTI12</i>      | aggatcggtcgccttttcgctgattatcttaacaaaactgaaatcgtacgctgcaggtcgac      | et <i>KTI12</i>    |
| S2- <i>KTI12</i>      | atttcgcttccatttaccttctgatattaatcac atgtatatcatcgatgaattcgagctcg     | et <i>KTI12</i>    |
| S3- <i>kTi12</i> -2   | ctcaggacataactgactacatcgacgataattgtaaagtagtcttctgacgctgcaggtcgac    | et <i>kTi12</i> -2 |
| S2- <i>kTi12</i> -2   | cccttactcaacggatcattgtgtccactgttttagccgattggaagatcgtatgaattcgagctcg | et <i>kTi12</i> -2 |
| S3- <i>kTi12</i> -3   | ccgatatcaatgatgatggtgcttctctgtagactgccattggaacgtagctgcaggtcgac      | et <i>kTi12</i> -3 |
| S2- <i>kTi12</i> -3   | ttgaagtaaatgaatgcctttcaatctctgcaattgcccacgtaacatcgatgaattcgagctcg   | et <i>kTi12</i> -3 |
| up- <i>KTI12</i>      | aagataggatcggtcgccttttcgctgattatcttaacaaaactgaaatccatggaaaagagaag   | tt <i>KTI12</i>    |
| down- <i>KTI12</i>    | agcaaatctcgtctgccattaccttctgatattaatcacatgtatatctacgactcactataggg   | tt <i>KTI12</i>    |
| <i>KTI12</i> -Pr-FW   | cgccagtgcgctctcttggtagc                                             | ds <i>KTI12</i>    |
| <i>KTI12</i> -PL-RV3  | caaatgtagcaagcgttcttaccactacatggtgcccaaatcaccaccagtg                | ds <i>KTI12</i>    |
| <i>KTI12</i> -PL-FW3  | cactggtgtagatttggggcaacatgtagttagtggaagacaacgcttgctaaaca            | ds <i>KTI12</i>    |
| <i>KTI12</i> -CBD-RV2 | tgtggtggacaaatcttccctcgaccatagctatctgtaacctttgatactattcaacg         | ds <i>KTI12</i> s  |
| <i>KTI12</i> -CBD-FW2 | cggtgaatagatcaaggttacagatagagcctatggtgaggtgaaaatttgcaccac           | ds <i>KTI12</i>    |
| <i>KTI12</i> -RV+50bp | ttcgtcttccattacctctg                                                | ds <i>KTI12</i>    |

Abbreviations: seq: DNA sequencing; ko: knock-out; et: epitope (c-Myc/HA) tagging; tt: TAP tagging; ds: domain swaps (P-loop or CBD) between yeast *Kti12* and plant *ELO4/DRL1* (see Figure 5).

Table S3. Plasmids.

| Plasmid     | Description                                                                               | Source/Reference |
|-------------|-------------------------------------------------------------------------------------------|------------------|
| YCplac33    | Yeast- <i>E. coli</i> shuttle vector (Amp <sup>R</sup> , <i>ARS1-CEN4</i> , <i>URA3</i> ) | [8]              |
| YCplac111   | Yeast- <i>E. coli</i> shuttle vector (Amp <sup>R</sup> , <i>ARS1-CEN4</i> , <i>LEU2</i> ) | [8]              |
| YEplac195   | Yeast- <i>E. coli</i> shuttle vector (Amp <sup>R</sup> , 2 $\mu$ ori, <i>URA3</i> )       | [8]              |
| pCR2.1-TOPO | PCR cloning vector (Amp <sup>R</sup> , Kan <sup>R</sup> , <i>E. coli</i> )                | Invitrogen       |
| pJHW27      | <i>KTI12</i> in YEplac195                                                                 | [1]              |
| pHMS14      | Conditional expression vector ( <i>GAL1::<math>\gamma</math>-toxin</i> , <i>HIS3</i> )    | [9]              |
| YDp-KIL/KIU | PCR template plasmids for gene deletion with <i>KILEU2/KIURA3</i>                         | [9]              |
| pYM1-5      | PCR template plasmid series for C-terminal epitope tagging                                | [10]             |
| pBS1479     | PCR template plasmid for C-terminal TAP-tagging                                           | [11]             |
| pDJ40/16    | <i>KTI12</i> in YCplac33/YCplac111                                                        | This study       |
| pDJ75       | <i>AtELO4/DRL1</i> in YCplac33                                                            | This study       |
| pSS1/pSS9   | <i>kTi12-1</i> in pJH27/YCplac33                                                          | This study       |
| pSS1/pSS9   | <i>kTi12-1</i> in pJH27/YCplac33                                                          | This study       |
| pSS2/pSS10  | <i>kTi12-2</i> in pJH27/YCplac33                                                          | This study       |
| pSS3/pSS14  | <i>kTi12-3</i> in pJH27/YCplac33                                                          | This study       |
| pSS4/pUW72  | <i>kTi12-4</i> in pJH27/YCplac33                                                          | This study       |
| pSS5/pSS12  | <i>kTi12-5</i> in pJH27/YCplac33                                                          | This study       |
| pSS6/pSS13  | <i>kTi12-6</i> in pJH27/YCplac33                                                          | This study       |
| pSS7        | <i>kTi12-7</i> in pDJ16                                                                   | This study       |
| pSS8/puWK67 | <i>kTi12-8</i> in pDJ16/YCplac33                                                          | This study       |
| pTU1        | YCplac33 + <i>TDH3</i> promoter for constitutive gene expression                          | [12]             |
| pTU1        | <i>KTI12</i> in pTU1                                                                      | G-T. Kim         |
| pGTK101/111 | <i>AtELO4/DRL1</i> in pTU1/YEplac195                                                      | G-T. Kim         |
| pGTK102/112 | <i>OsELO4DRL1</i> in pTU1/YEplac195                                                       | G-T. Kim         |
| pGTK103/113 | <i>PpELO4/DRL1</i> in pTU1/YEplac195                                                      | G-T. Kim         |
| pHB17       | <i>KTI12-c-Myc</i> in YCplac33                                                            | This study       |
| pMW5        | <i>KTI12-PLELO4-c-Myc</i> in YCplac33, (P-loop domain swap, Figure 5)                     | This study       |
| pMW7        | <i>KTI12-CBDELO4-c-Myc</i> in YCplac33 (CBD swap, Figure 5)                               | This study       |

2. Supplementary Figures

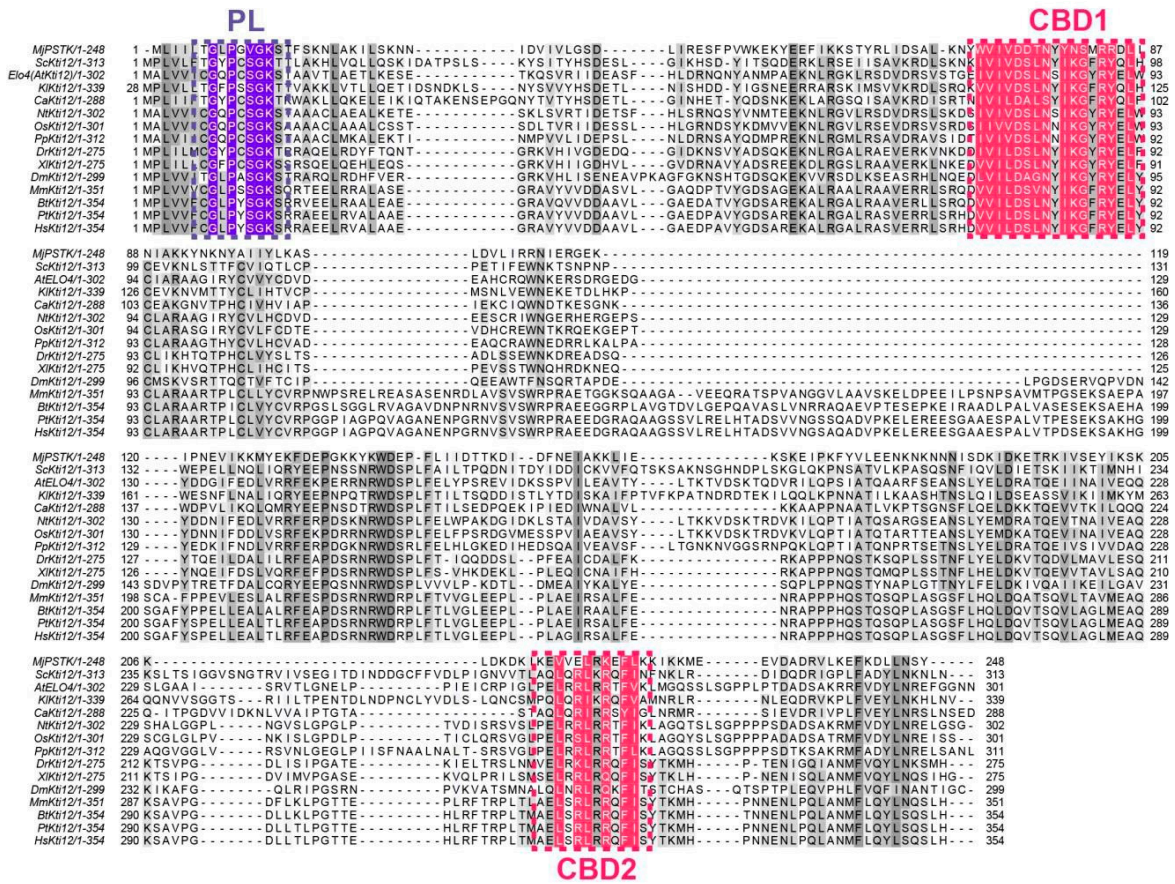

**Figure S1.** Multiple Kti12 sequence alignment. Main functional domains of Kti12 proteins are conserved in a variety of species and archaeal PSTK [O-phosphoseryl-tRNA(Sec) kinase]. Protein families (Pfam) database analyses and MUSCLE multiple alignment between archaeal PSTK (MjPSTK; Q58933) and Kti12 proteins from selected species reveals conserved protein motifs with putative functional roles in NTP (P-loop, PL) and CaM binding (CBD1 and CBD2). *Saccharomyces cerevisiae* S288C (ScKti12; NP\_012812.1), *Arabidopsis thaliana* (ELO4(AtKti12); NP\_172840.1), *Kluyveromyces lactis* NRRL Y-1140 (KIKti12; XP\_455212.1), *Candida albicans* SC5314 (CaKti12; AOW31075.1), *Nicotiana tomensisiformis* (NtKti12; XP\_009612555.1), *Oryza Sativa* (OsKti12; XP\_015615301.1), *Physcomitrella patens* (PpKti12; EDQ67537.1), *Danio rerio* (DrKti12; NP\_001119890.1), *Xenopus laevis* (XIKti12; NP\_001090073.1), *Drosophila melanogaster* (DmKti12; AAF45700.1 CG3587), *Mus musculus* (MmKti12; NP\_083847.1), *Bos taurus* (BtKti12; NP\_001074206.1), *Pan tryglodytes* (PtKti12; XP\_009456012.1) and *Homo sapiens* (HsKti12; NP\_612426.1).

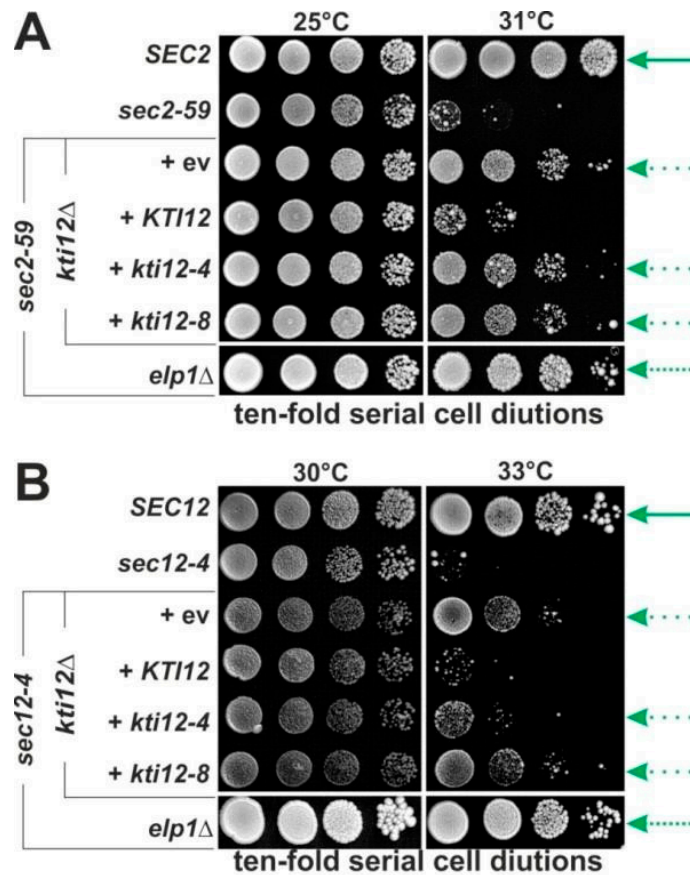

**Figure S2.** *ELP1* and *KTI12* mutations rescue thermosensitivity of *sec2-59<sup>ts</sup>* and *sec12-4<sup>ts</sup>* mutants. **(A)** Suppression of *sec2-59<sup>ts</sup>*. Equivalent ten-fold serial cell dilutions of the indicated strain backgrounds were cultivated at permissive (25 °C, left panel) and restrictive (31 °C) temperatures for 3 d. Growth rescue of *sec2-59<sup>ts</sup>* by *ELP1* gene deletion (*elp1*) and partial suppression by *KTI12* gene mutations (*kti12*; *kti12-4*; *kti12-8*) is indicated (dotted arrows) in relation to wild-type *SEC2* growth (solid arrow); **(B)** Suppression of *sec12-4<sup>ts</sup>*. Ten-fold serial cell dilutions of the indicated strain backgrounds were cultivated at permissive (30 °C, left panel) and restrictive (33 °C, left panel) temperatures for 3 d. Growth rescue of *sec12<sup>ts</sup>* by *ELP1* gene deletion (*elp1*) and partial suppression by *KTI12* gene mutations (*kti12*; *kti12-4*; *kti12-8*) are indicated (dotted arrows) in relation to wild-type *SEC2* growth (solid arrow).

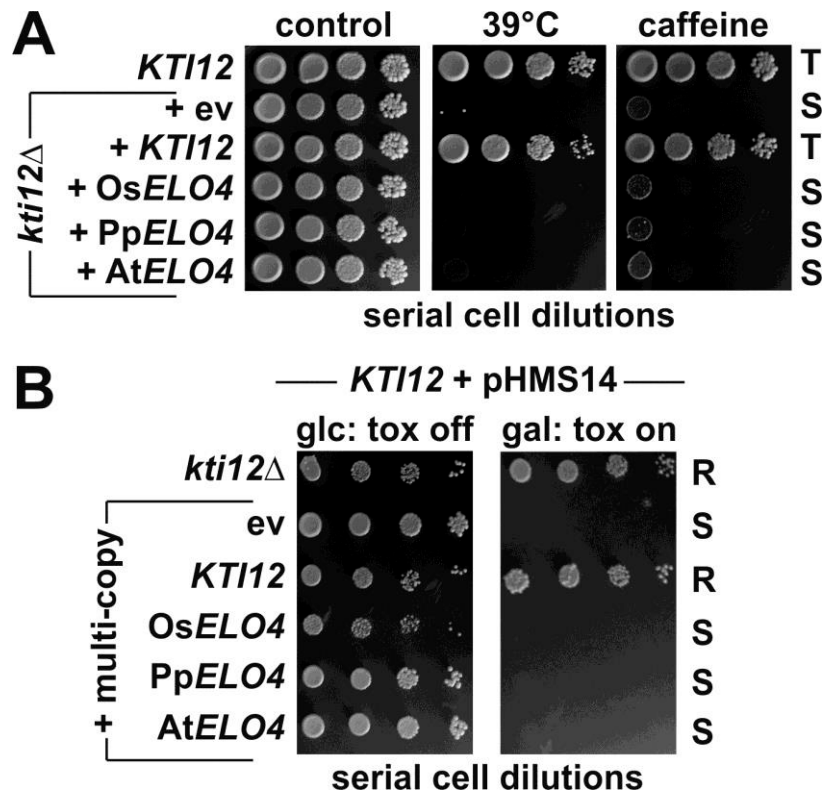

**Figure S3.** Analysis of yeast *kti12* cross-complementation by *ELO4* plant homologs. **(A)** Failure of single-copy *ELO4* from the three plant sources, i.e. from *Arabidopsis* (*AtELO4*), rice (*OsELO4*) and moss (*PpELO4*), to rescue phenotypes triggered by a *kti12* knock-out mutation, i.e., inviability at 39 °C and sensitivity to caffeine. Equivalent ten-fold serial cell dilutions of the tester strains with the indicated genetic backgrounds were cultivated under standard (30 °C, left panel) or elevated temperatures (39 °C, middle panel) and in the presence of chemical stress (7.5 mM caffeine, right panel) and grown for 3 d. Inviability at 39 °C and sensitivity to growth inhibition by caffeine are denoted by ‘S’; tolerance towards 39 °C and caffeine stress are indicated by ‘T’; **(B)** Failure of multi-copy plant *ELO4* to induce resistance against expression of the  $\psi$ -toxin tRNase from plasmid pHMS14 [6], which is typical of cells maintaining multi-copy *KTI12*. Equivalent ten-fold serial cell dilutions of the indicated tester strains were cultivated on glucose repressing ( $\psi$ -toxin: off, left panel) or galactose inducing ( $\psi$ -toxin: on, right panel) media and grown for 3 d at 30 °C. Empty multi-copy vector control is abbreviated by ‘ev’; Resistance/sensitivity towards conditional expression of zymocin’s  $\psi$ -toxin tRNase subunit on galactose is denoted by ‘R/S’.

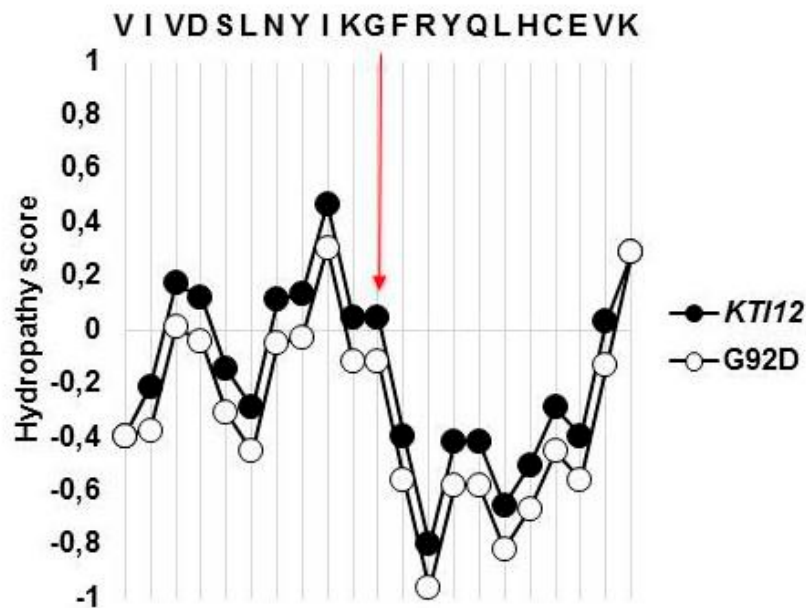

**Figure S4.** Hydropathy plots of Val-82 to Lys-102 spanning regions in Kti12 & Kti12-8. The plots were drawn using the method by Kyte and Doolittle [13] with ExPASy ProtScale (<http://web.expasy.org/protscale/pscale/Hphob.Doolittle.html>) and a window size of 19. The x axis indicates residues from Val-82 to Lys-102 in Kti12 with the Gly-92 residue (and its G92D substitution in Kti12-8) highlighted by a red arrow. The y axis indicates the relative hydrophobicity score of each residue in the context of full-length protein, where values above the midpoint line represent more hydrophobicity (internal sequences in the native protein) and ones below more hydrophilicity (external sequences in the native protein). Gly-92 physically localizes at the most hydrophilic surface in this region and the G92D substitution in Kti12-8 increases its hydrophobicity negative score suggesting the mutation renders the protein surface at this region more exposed.

## References

- Butler, A.R.; White, J.H.; Folawiyo, Y.; Edlin, A.; Gardiner, D.; Stark, M.J. Two *Saccharomyces cerevisiae* genes which control sensitivity to G1 arrest induced by *Kluyveromyces lactis* toxin. *Mol. Cell. Biol.* **1994**, *14*, 6306–6316.
- Jablonowski, D.; Fichtner, L.; Stark, M.J.R.; Schaffrath, R. The yeast Elongator histone acetylase requires Sit4-dependent dephosphorylation for toxin-target capacity. *Mol. Biol. Cell* **2004**, *15*, 1459–1469.
- Huang, B.; Johansson, M.J.; Bystrom, A.S. An early step in wobble uridine tRNA modification requires the Elongator complex. *RNA* **2005**, *11*, 424–436.
- Su, J.Y.; Belmont, L.; Sclafani, R.A. Genetic and molecular analysis of the *SOE1* gene: A tRNA (3Glu) missense suppressor of yeast *cdc8* mutations. *Genetics* **1990**, *124*, 523–531.
- Jablonowski, D.; Zink, S.; Mehlgarten, C.; Daum, G.; Schaffrath, R. tRNA<sup>Glu</sup> wobble uridine methylation by Trm9 identifies Elongator's key role for zymocin-induced cell death in yeast. *Mol. Microbiol.* **2006**, *59*, 677–688.
- Rahl, P.B.; Chen, C.Z.; Collins, R.N. Etp1p, the yeast homolog of the FD disease syndrome protein, negatively regulates exocytosis independently of transcriptional elongation. *Cell* **2005**, *17*, 841–853.
- Murakami, A.; Kimura, K.; Nakano, A. The inactive form of a yeast casein kinase I suppresses the secretory defect of the *sec12* mutant. *J. Biol. Chem.* **1999**, *274*, 3804–3810.
- Gietz, R.D.; Sugino, A. New yeast-*Escherichia coli* shuttle vectors constructed with *in vitro* mutagenized yeast genes lacking six-base pair restriction sites. *Gene* **1988**, *74*, 527–534.
- Frohloff, F.; Fichtner, L.; Jablonowski, D.; Breunig, K.D.; Schaffrath, R. *Saccharomyces cerevisiae* Elongator mutations confer resistance to the *Kluyveromyces lactis* zymocin. *EMBO J.* **2001**, *20*, 1993–2003.

10. Knop, M.; Siegers, K.; Pereira, G.; Zachariae, W.; Winsor, B.; Nasmyth, K.; Schiebel, E. Epitope tagging of yeast genes using a PCR-based strategy: more tags and improved practical routines. *Yeast* **1999**, *15*, 963–972.
11. Puig, O.; Caspary, F.; Rigaut, G.; Rutz, B.; Bouveret, E.; Bragado-Nilsson, E.; Wilm, M.; Séraphin, B. The tandem affinity purification (TAP) method: A general procedure of protein complex purification. *Methods* **2001**, *24*, 218–229.
12. Jun, S.E.; Cho, K-H.; Hwang, J-Y.; Abdel-Fattah, W.; Hammermeister, A.; Schaffrath, R.; Bowman, J.L.; Kim, G.T. Comparative analysis of the conserved functions of *Arabidopsis* DRL1 and yeast KTI12. *Mol. Cells* **2015**, *38*, 243–250.
13. Kyte, J.; Doolittle, R.F. A simple method for displaying the hydropathic character of a protein. *J. Mol. Biol.* **1982**, *157*, 105–132.

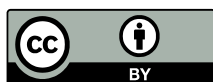

© 2017 by the authors. Licensee MDPI, Basel, Switzerland. This article is an open access article distributed under the terms and conditions of the Creative Commons by Attribution (CC-BY) license (<http://creativecommons.org/licenses/by/4.0/>).
